# Supplementary material for: 16S rRNA gene metabarcoding and TEM reveals different ecological strategies within the genus Neogloboquadrina (planktonic foraminifer)
Source: PubMed Central journal article supplement (PMC5788372; doi:10.1371/journal.pone.0191653), 2018-01-29

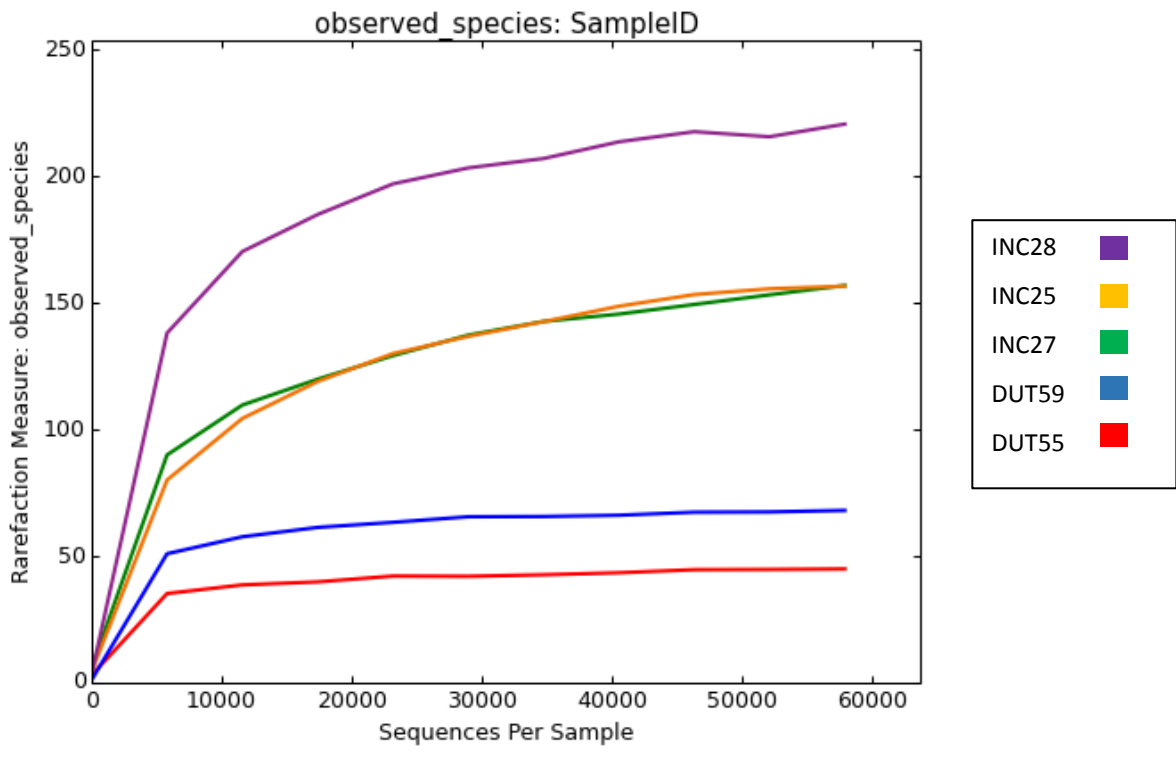

Supplement: pone.0191653.s001.pdf [file pone.0191653.s001.pdf]
